# Supplementary material
Source: Royal Society of Chemistry journal article supplement (doi:10.1039/d6qm00220j)
Supplement: d6qm00220j2.pdf [file d6qm00220j2.pdf]

## Supplementary information

# **Eu<sup>3+</sup>-Crosslinked Polymers with Tunable Ultralong Phosphorescence for Time-Resolved Information Encryption**

Xiao Yang,<sup>a</sup> Can Diao,<sup>a</sup> Pingru Su,<sup>\*a</sup> Yu Tang<sup>\*ab</sup>

a. State Key Laboratory of Natural Product Chemistry, Key Laboratory of Nonferrous Metal Chemistry and Resources Utilization of Gansu Province, College of Chemistry and Chemical Engineering, Lanzhou University, Lanzhou, 730000, P. R. China.

b. State Key Laboratory of Baiyunobo Rare Earth Resource Researches and Comprehensive Utilization, Baotou Research Institute of Rare Earths, Baotou 014030, P. R. China

\*Correspondence to be done at: [supr@lzu.edu.cn](mailto:supr@lzu.edu.cn), [tangyu@lzu.edu.cn](mailto:tangyu@lzu.edu.cn)

## Contents

### Chemical and Materials

#### Characterization Methods

#### Synthesis of polymer

#### Synthesis of Ligands and Eu<sup>3+</sup> Complexes

**Figure S1.** <sup>1</sup>H NMR (600 MHz, Methanol-*d*<sub>4</sub>, 298 K) spectrum of PVC

**Figure S2.** <sup>13</sup>C NMR (600 MHz, Methanol-*d*<sub>4</sub>, 298 K) spectrum of PVC.

**Figure S3.** <sup>1</sup>H NMR (600 MHz, D<sub>2</sub>O, 298 K) spectrum of PH.

**Figure S4.** <sup>1</sup>H NMR (600 MHz, Chloroform-*d*, 298 K) spectrum of compound 1.

**Figure S5.** <sup>13</sup>C NMR (600 MHz, Chloroform-*d*, 298 K) spectrum of compound 1

**Figure S6.** <sup>1</sup>H NMR (600 MHz, Chloroform-*d*, 298 K) spectrum of compound 2.

**Figure S7.** <sup>13</sup>C NMR (600 MHz, Chloroform-*d*, 298 K) spectrum of compound 2.

**Figure S8.** <sup>1</sup>H NMR (600 MHz, CD<sub>3</sub>OD/DMSO-*d*<sub>6</sub> = 1:10, v/v, 298 K) spectrum of L<sup>-</sup> and Na[EuL<sub>4</sub>].

**Figure S9.** ESI-MS mass spectrometry of [M-Cl]<sup>+</sup>. Illustration: theoretical and experimental diagram of ions.

**Figure S10.** ESI-MS mass spectrometry of [M-H]<sup>-</sup>. Illustration: theoretical and experimental diagram of ions.

**Figure S11.** ESI-MS mass spectrometry of [ML<sub>4</sub>]<sup>-</sup>. Illustration: theoretical and experimental diagram of ions.

**Figure S12.** Phosphorescence-decay profiles of PH powder.

**Figure S13.** UV-vis absorption spectra of Na[EuL<sub>4</sub>].

**Figure S14.** Photoluminescence spectra of Na[EuL<sub>4</sub>].

**Figure S15.** Decay curves at 616 nm for Na[EuL<sub>4</sub>].

**Figure S16.** (a) TGA curves of PH (x=0) and PVC@Eu<sub>x</sub> (x = 0.005, 0.01, 0.1, 0.5, 1.0) under N<sub>2</sub> flow (50 mL·min<sup>-1</sup>) with a heating rate of 10 °C·min<sup>-1</sup>. (b) DTG curves corresponding to the TGA data

**Figure S17.** Attenuated total reflectance-Fourier transform infrared (ATR-FTIR) spectra of PVC@Eu<sub>x</sub> powders at different doping ratios of Eu<sup>3+</sup> complex.

**Figure S18.** Photoluminescence emission spectra of PVC@Eu<sub>x</sub> powders.

**Figure S19.** Phosphorescence emission spectra of PVC@Eu<sub>x</sub> powders (delay time 1 ms).

**Figure S20.** Attenuated total reflectance-Fourier transform infrared (ATR-FTIR) spectra of PVC@Eu<sub>x</sub> powders at different doping ratios of Eu<sup>3+</sup> complex.

**Table S1.** Characterizations of polymers by aqueous GPC (a: PH; b-h: PVC@Eu<sub>x</sub> x=0.005-1).



mixture was stirred at 30 °C for 36.5 h. Filtration was performed to get rid of solid impurity. Pouring anhydrous ether into the filtrate, the resulting precipitation was collected by filtration to afford compound PVC as light golden yellow, (1.05 g). Yield: 53.4%. <sup>1</sup>H NMR (600 MHz, Methanol-*d*<sub>4</sub>, 298 K) δ 9.04 – 8.99 (m, 2H), 8.44 – 8.39 (m, 2H), 8.03 – 7.97 (m, 2H), 7.69 – 7.60 (m, 3H), 7.58 – 7.53 (m, 2H), 7.53 – 7.46 (m, 2H), 6.77 (dd, *J* = 17.6, 10.9 Hz, 1H), 5.85 (dd, *J* = 17.6, 0.8 Hz, 1H), 5.82 (s, 2H), 5.32 (dd, *J* = 11.0, 0.8 Hz, 1H). <sup>13</sup>C NMR (151 MHz, Methanol-*d*<sub>4</sub>, 298 K) δ 144.39, 135.73, 132.16, 129.58, 129.07, 127.85, 126.96, 124.93, 114.57, 63.17, 48.04, 47.90, 47.76, 47.61, 47.47, 47.33, 47.19. Calcd. for [C<sub>20</sub>H<sub>18</sub>NCl-Cl]<sup>+</sup>: 272.14, found: 272.13.

**Synthesis of polymer PH** General synthesis of the PH. In 6 mL anhydrous DMF under dark and argon atmosphere, PH was prepared by copolymerization of PVC (30.7 mg, 0.1 mmol, 1.0 eq) and acrylamide (703.8 mg, 9.9 mmol, 99.0 eq) with 2,2'-azobis(2-methylpropionitrile) (AIBN) (16.4 mg) as radical initiator at 65 °C for 12 h. After cooling, the crude solid obtained through filtration was dissolved by distilled water and the mixture was dialyzed (cut off = 8,000) against water for 5 d. The resulting solution was lyophilized and further dried under vacuum to obtain solid polymer. Similar method was performed to afford other polymers.

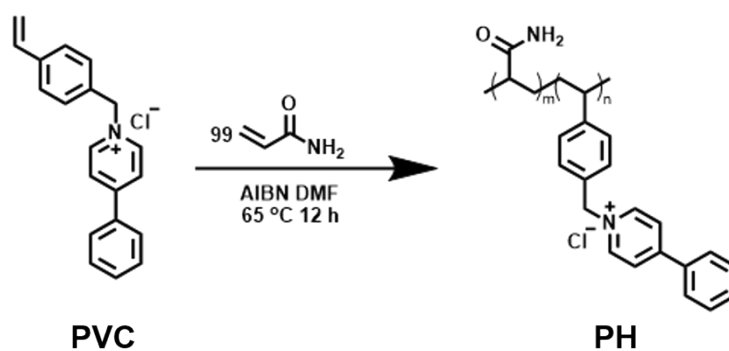

Scheme S2. Synthesis of the polymer PH.

#### 4. Synthesis of Ligands and Eu<sup>3+</sup> Complexes

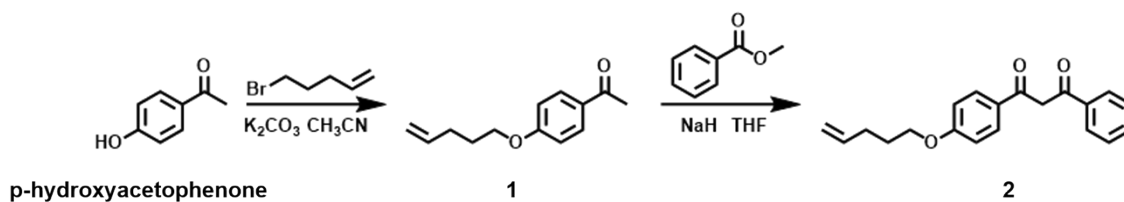

Scheme S3. Synthesis of the compound 2 (L).

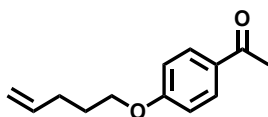

### Synthesis of 1-[4-(4-Penten-1-yloxy)phenyl]ethanone (compound 1).

A 250 mL three-neck round-bottom flask was charged with p-hydroxyacetophenone (6.13 g, 45 mmol), 5-bromo-1-pentene (6.29 g, 42 mmol), potassium carbonate (11.06 g, 80 mmol) and anhydrous acetonitrile (100 mL) with a condensing reflux apparatus and a magnetic stirring system. After the reaction was complete, the acetonitrile solvent was removed by vacuum concentration using a rotary evaporator. The residue was dissolved in 100 mL of dichloromethane. The resulting organic layer was sequentially washed with saturated saline solution ( $3 \times 50$  mL) to remove inorganic salt impurities. After drying over anhydrous sodium sulfate, the mixture was filtered and concentrated to yield the crude product. The crude product was purified by column chromatography on silica gel eluted with (PE/ EA 20:1, v/v) to give the compound 2 (7.64 g). Yield 88.07% as a colorless transparent liquid.  $^1\text{H}$  NMR (600 MHz,  $\text{CDCl}_3$ , 298 K)  $\delta$  7.95 – 7.91 (m, 2H), 6.94 – 6.90 (m, 2H), 5.85 (ddt,  $J = 16.9, 10.2, 6.7$  Hz, 1H), 5.10 – 4.99 (m, 2H), 4.04 (t,  $J = 6.4$  Hz, 2H), 2.55 (s, 3H), 2.28 – 2.22 (m, 2H), 1.91 (dt,  $J = 13.5, 6.6$  Hz, 2H).  $^{13}\text{C}$  NMR (151 MHz,  $\text{CDCl}_3$ , 298 K)  $\delta$  196.78, 163.03, 137.53, 130.59, 130.21, 115.44, 114.15, 67.38, 30.01, 28.24, 26.34.

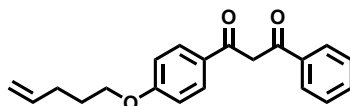

### Synthesis of 1-(4-(pent-4-en-1-yloxy)phenyl)-3-phenylpropane-1,3-dione (compound 2).

A 250 mL three-neck round-bottom flask was charged with compound 1 (4.76 g, 35 mmol) and anhydrous tetrahydrofuran (100 mL) with a constant-pressure dropping funnel and condenser. Slowly add sodium hydride (2.00 g, 50 mmol) in portions under ice bath conditions, maintaining the system temperature below  $10\text{ }^\circ\text{C}$  throughout the addition. Subsequently, remove the ice bath and raise the reaction system to  $70\text{ }^\circ\text{C}$ , refluxing for 5 minutes. Slowly add a solution of methyl benzoate (5.11 g, 25 mmol) in tetrahydrofuran (20 mL) via a constant-pressure dropping funnel, controlling the addition rate to maintain the reaction temperature at  $70\text{ }^\circ\text{C}$ . Continue stirring the reaction at  $70\text{ }^\circ\text{C}$  for 24 hours, monitoring the reaction progress via thin-layer chromatography. Upon completion, remove the tetrahydrofuran solvent using a rotary evaporator. The reaction mixture was quenched by the addition of 100 mL ice water, the

pH was adjusted to around 1 by progressively adding 3M hydrochloric acid solution. The mixture obtained from the hydrochloric acid solution was extracted with dichloromethane (3 × 50 mL). The organic layers were combined and washed with saturated sodium chloride solution (3 × 50 mL). The organic layers were combined and washed with saturated sodium chloride solution (3 × 50 mL). After drying over anhydrous sodium sulfate, the mixture was filtered and concentrated under reduced pressure to yield the crude product. The crude product was purified by column chromatography on silica gel eluted with (PE/ EA 30:1, v/v) to give the compound 2 (7.64 g, 88.07%) as a white crystalline compound 2 (4.84 g). Yield 58.96%. <sup>1</sup>H NMR (600 MHz, CDCl<sub>3</sub>, 298 K) δ 7.97 (d, J = 9.0 Hz, 4H), 7.54 (t, J = 7.3 Hz, 1H), 7.48 (t, J = 7.5 Hz, 2H), 6.97 (d, J = 8.8 Hz, 2H), 6.80 (s, 1H), 5.86 (ddt, J = 16.9, 10.2, 6.6 Hz, 1H), 5.08 (d, J = 17.1 Hz, 1H), 5.02 (d, J = 10.2 Hz, 1H), 4.05 (t, J = 6.4 Hz, 2H), 2.26 (q, J = 7.4 Hz, 2H), 1.92 (p, J = 6.7 Hz, 2H). <sup>13</sup>C NMR (151 MHz, CDCl<sub>3</sub>, 298 K) δ 186.26, 183.98, 162.81, 137.57, 135.61, 133.63, 132.16, 131.29, 129.33, 128.92, 128.74, 128.65, 128.06, 127.01, 115.49, 115.44, 114.48, 114.40, 92.36, 67.43, 30.04, 29.99, 28.28. ESI-MS (m/z): Calcd. for [C<sub>20</sub>H<sub>20</sub>O<sub>3</sub>-H<sup>+</sup>]: 307.13, found: 307.14.

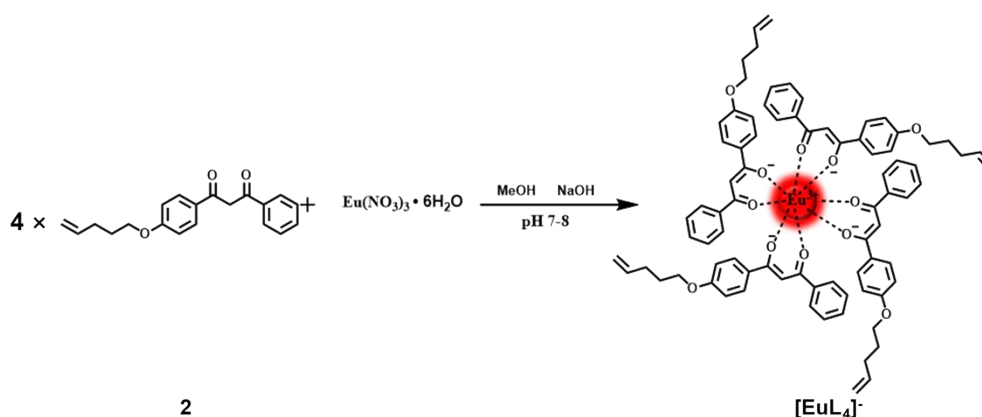

**Scheme S4.** Synthesis of [EuL<sub>4</sub>]<sup>-</sup>.

**Synthesis of Eu<sup>3+</sup>-complex ([EuL<sub>4</sub>]<sup>-</sup>).** The complex [EuL<sub>4</sub>]<sup>-</sup> was synthesized according to previous work. Compound 2 (0.4 M, 0.1233 g) was dissolved in 5 mL MeOH. The solution was adjusted pH to 8.0 with 1 M NaOH (400 μL), resulting a clear solution. And then, the solution of Eu(NO<sub>3</sub>)<sub>3</sub>·6H<sub>2</sub>O (0.1 M, 0.0446 g) was dropped into the above solution, forming a light yellow turbid solution, which was stirred at 60 °C for another 12 h. The product was vacuum dried after filtering and washing with water and Ethanol for several times. Yield 90%. <sup>1</sup>H NMR (600 MHz, DMSO-*d*<sub>6</sub>) δ 6.58 (t, J = 7.1 Hz, 1H), 6.22 (d, J = 7.0 Hz, 1H), 5.76 – 5.69 (m, 2H),

5.45 (s, 1H), 4.93 – 4.86 (m, 1H), 4.12 – 4.08 (m, 1H), 4.08 (s, 11H), 3.80 (t, J = 6.4 Hz, 2H), 3.57 (t, J = 6.4 Hz, 1H), 2.66 (q, J = 7.2 Hz, 16H), 2.12 – 2.05 (m, 1H), 1.98 – 1.92 (m, 1H), 1.72 – 1.64 (m, 1H), 1.53 (dt, J = 8.1, 6.6 Hz, 1H), 1.03 (t, J = 7.2 Hz, 23H). Calcd. for  $[C_{80}H_{80}EuO_{12}\cdot 4H^+]$ : 1381.45, found: 1381.48.

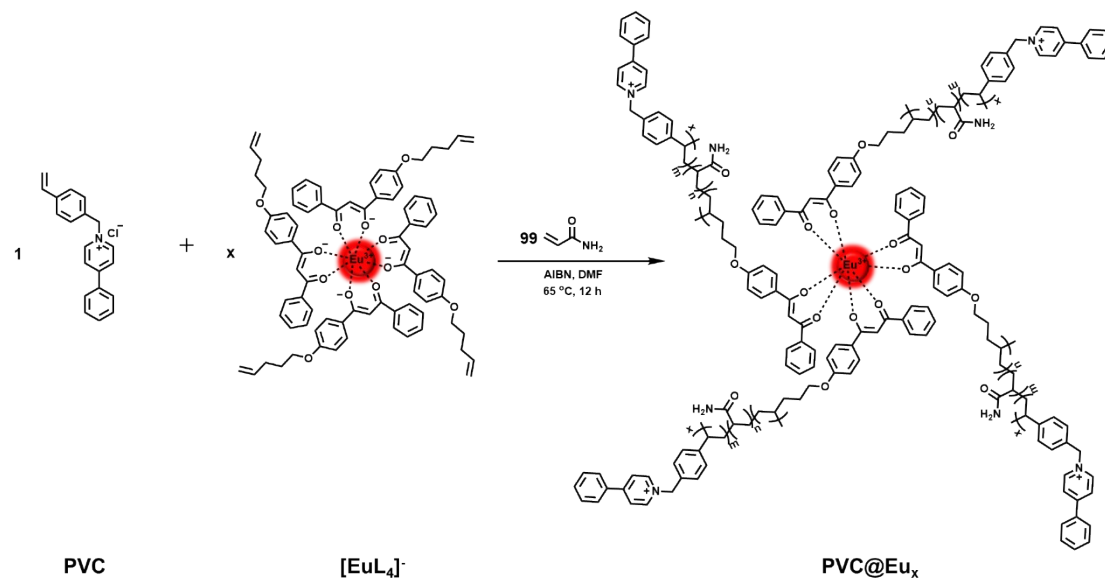

**Scheme S5.** Synthesis of **PVC@Eu<sub>x</sub>** polymer.

**Synthesis of PVC@Eu<sub>x</sub> polymer.** PVC@Eu-0.5 was prepared as a model. In 6 mL anhydrous DMF under dark and argon atmosphere, PVC@Eu-0.5 was prepared by copolymerization of PVC (30.7 mg, 0.1 mmol, 1.0 eq), Eu(PED)<sub>4</sub> (69.1 mg, 0.05 mmol, 0.5 eq) and acrylamide (703.8 mg, 9.9 mmol, 99.0 eq) with 2,2'-azobis(2-methylpropionitrile) (AIBN) (16.4 mg, 0.1 mmol, 1.0 eq) as radical initiator at 65 °C for 12 h. After cooling, the crude solid obtained through filtration was dissolved by distilled water and the mixture was dialyzed (cut off = 8,000) against water for 5 d. The resulting solution was lyophilized and further dried under vacuum to obtain solid polymer. Similar method was performed to afford other polymers.

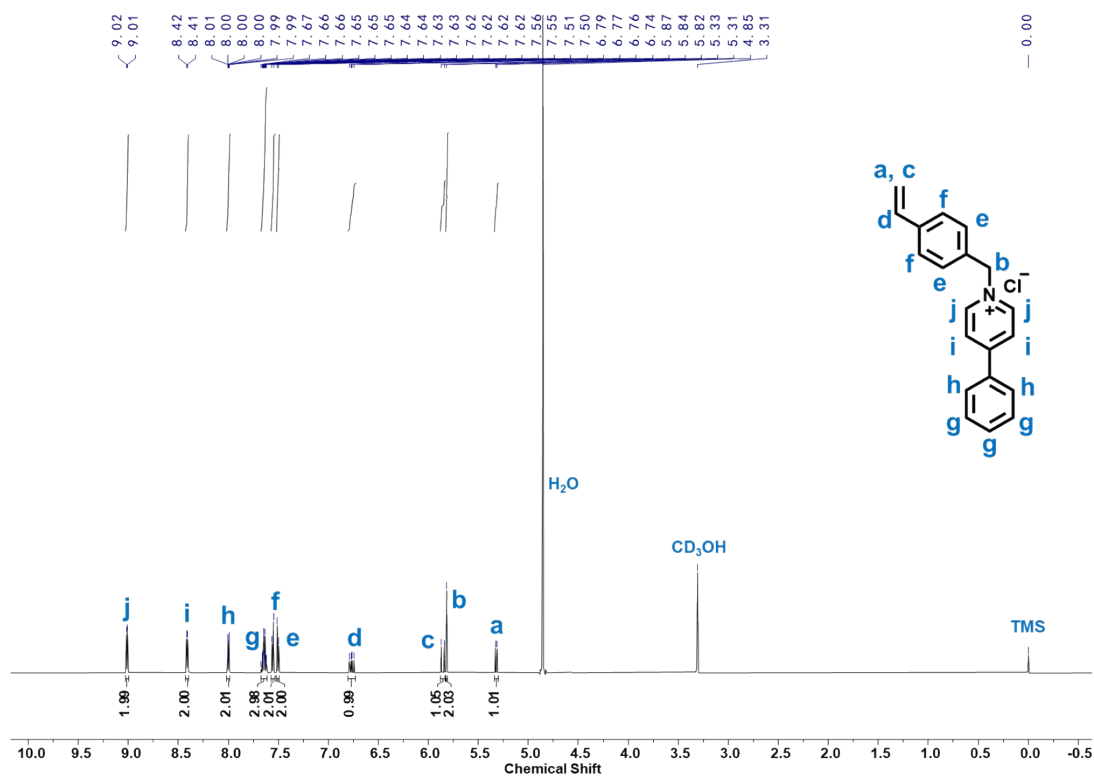

**Figure S1.**  $^1\text{H}$  NMR (600 MHz, Methanol- $d_4$ , 298 K) spectrum of PVC.

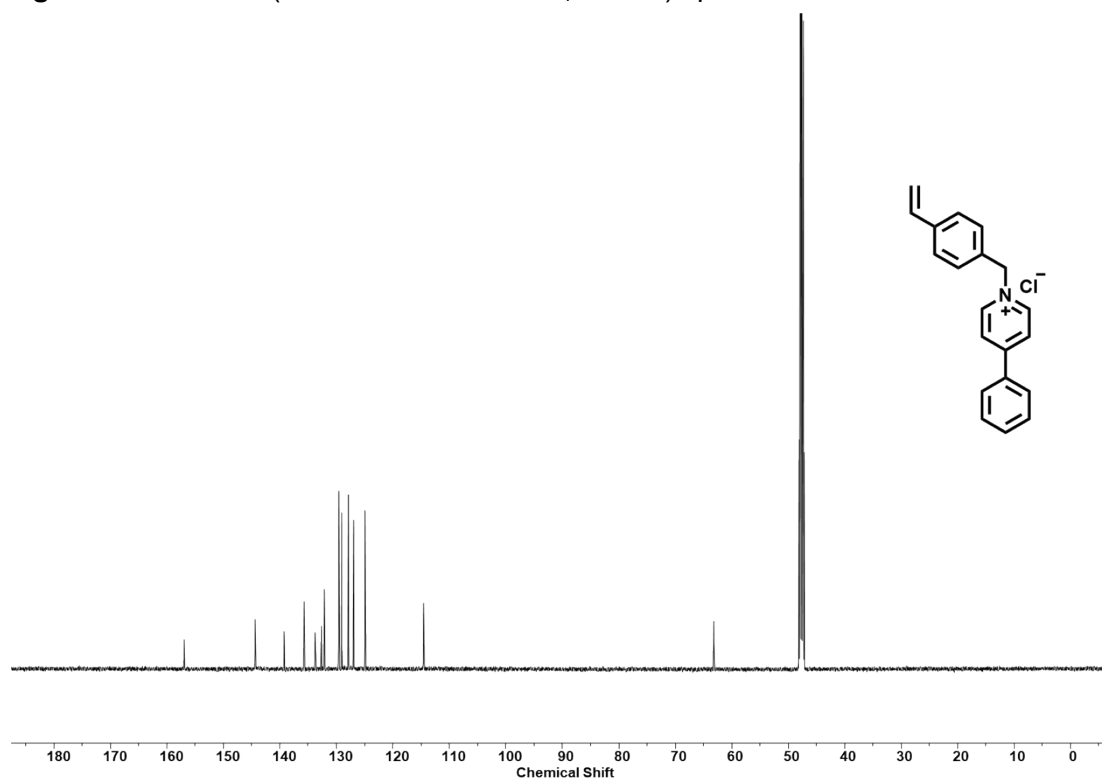

**Figure S2.**  $^{13}\text{C}$  NMR (600 MHz, Methanol- $d_4$ , 298 K) spectrum of PVC.

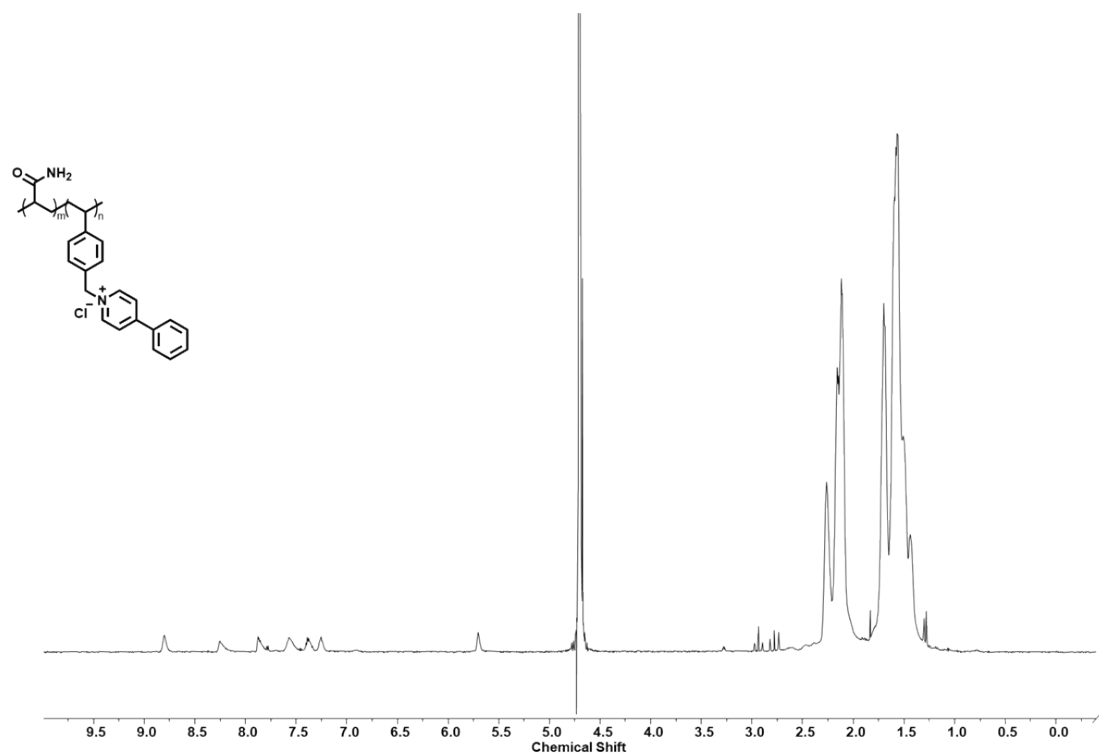

**Figure S3.** <sup>1</sup>H NMR (600 MHz, D<sub>2</sub>O, 298 K) spectrum of PH.



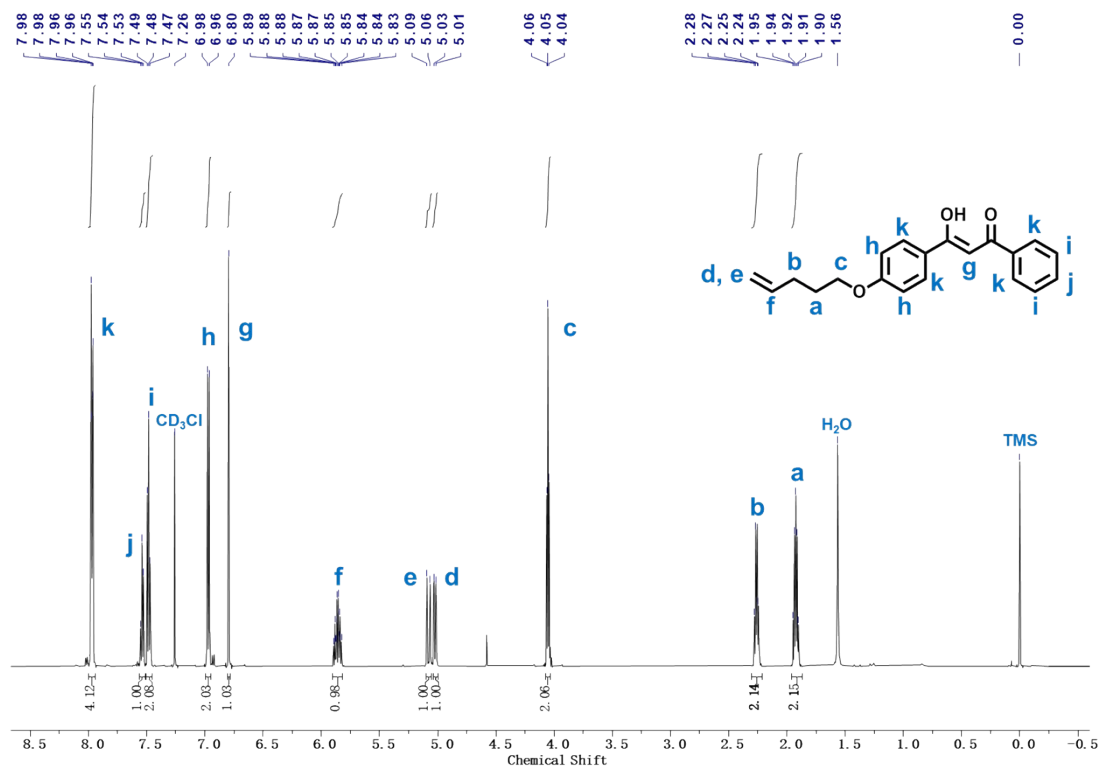

**Figure S6.** <sup>1</sup>H NMR (600 MHz, Chloroform-*d*, 298 K) spectrum of compound 2.

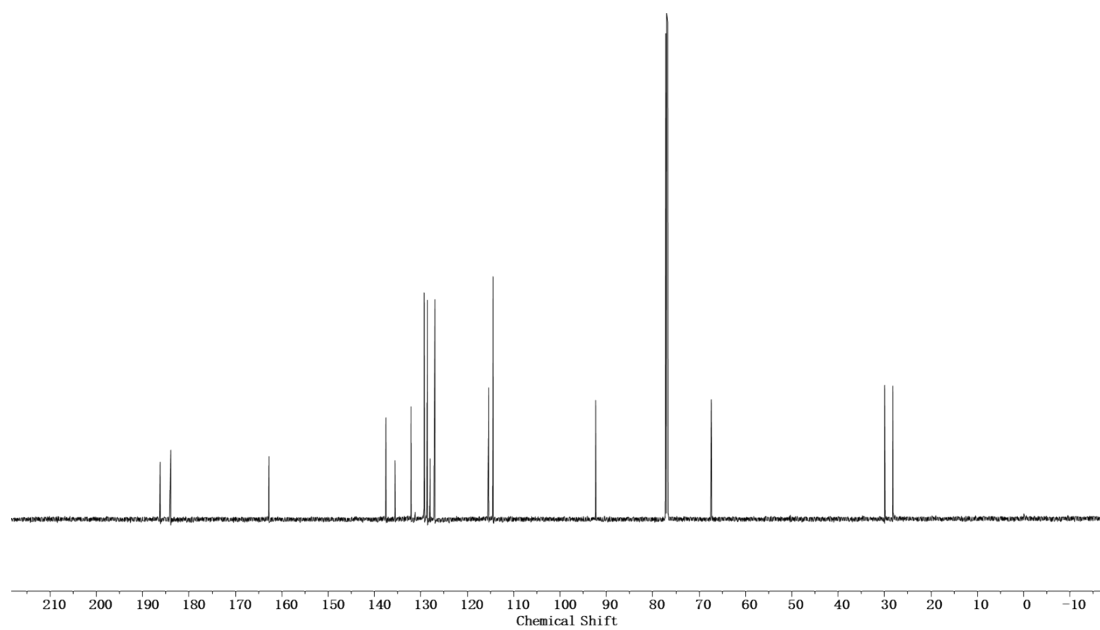

**Figure S7.** <sup>13</sup>C NMR (600 MHz, Chloroform-*d*, 298 K) spectrum of compound 2.

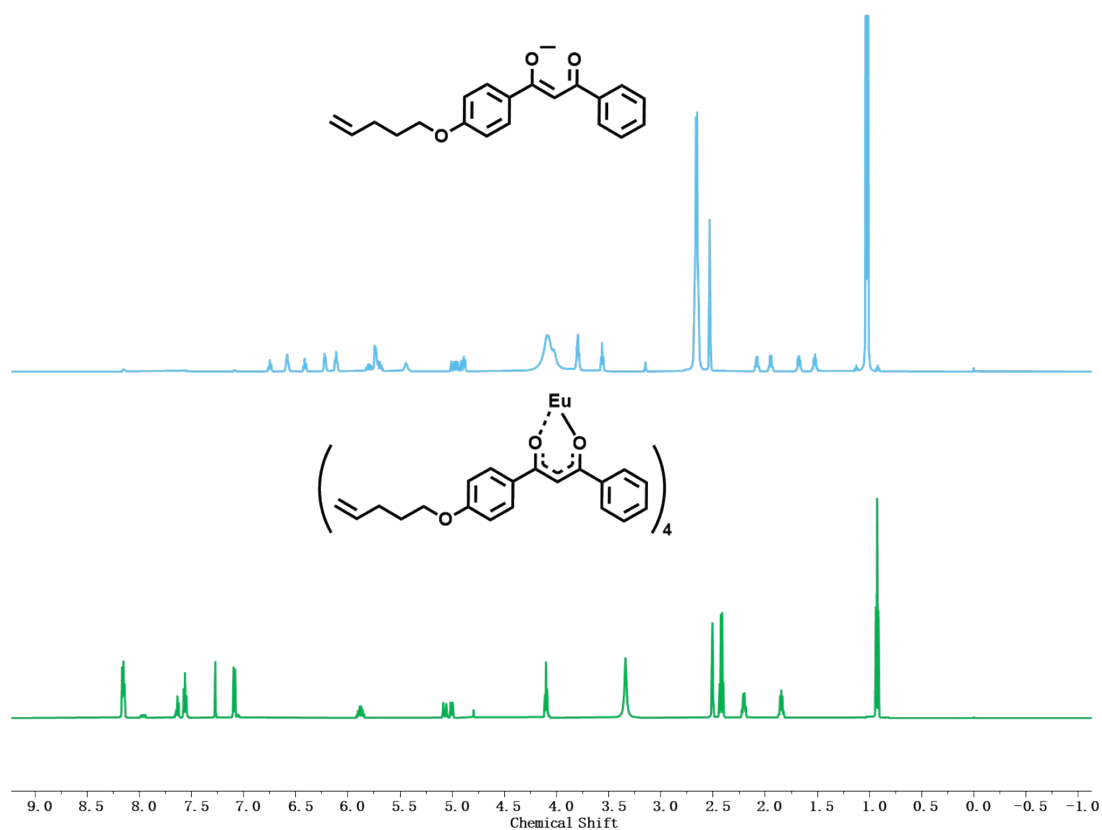

**Figure S8.**  $^1\text{H}$  NMR (600 MHz,  $\text{CD}_3\text{OD}/\text{DMSO}-d_6 = 1:10$ , v/v, 298 K) spectrum of L- and  $\text{Na}[\text{EuL}_4]$ .

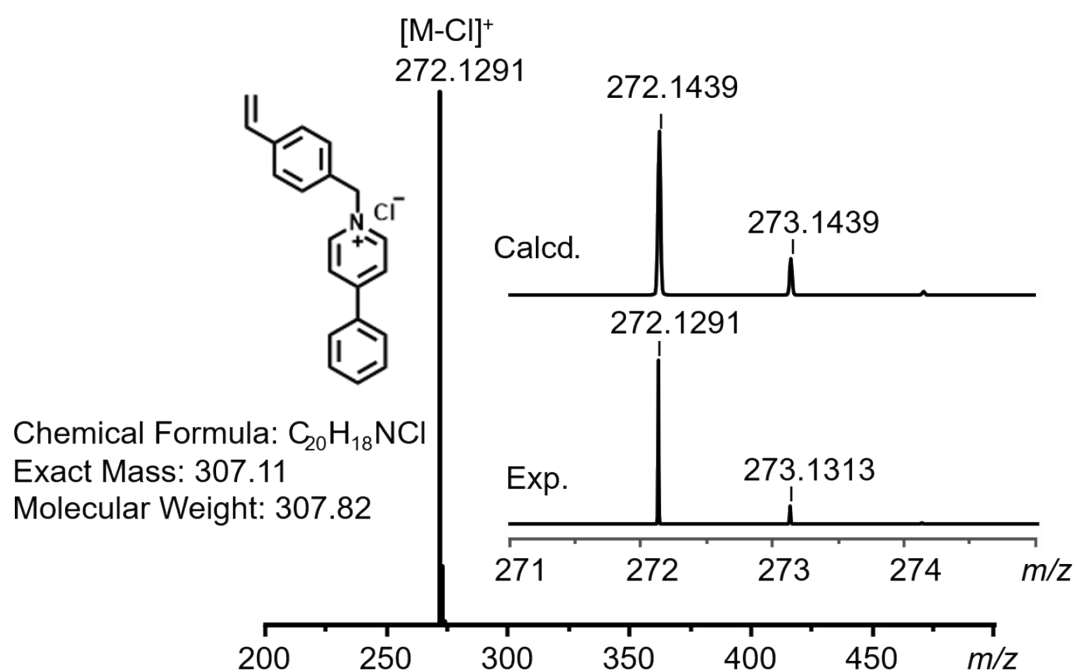

**Figure S9.** ESI-MS mass spectrometry of  $[\text{M}-\text{Cl}]^+$ . Illustration: theoretical and experimental diagram of ions.

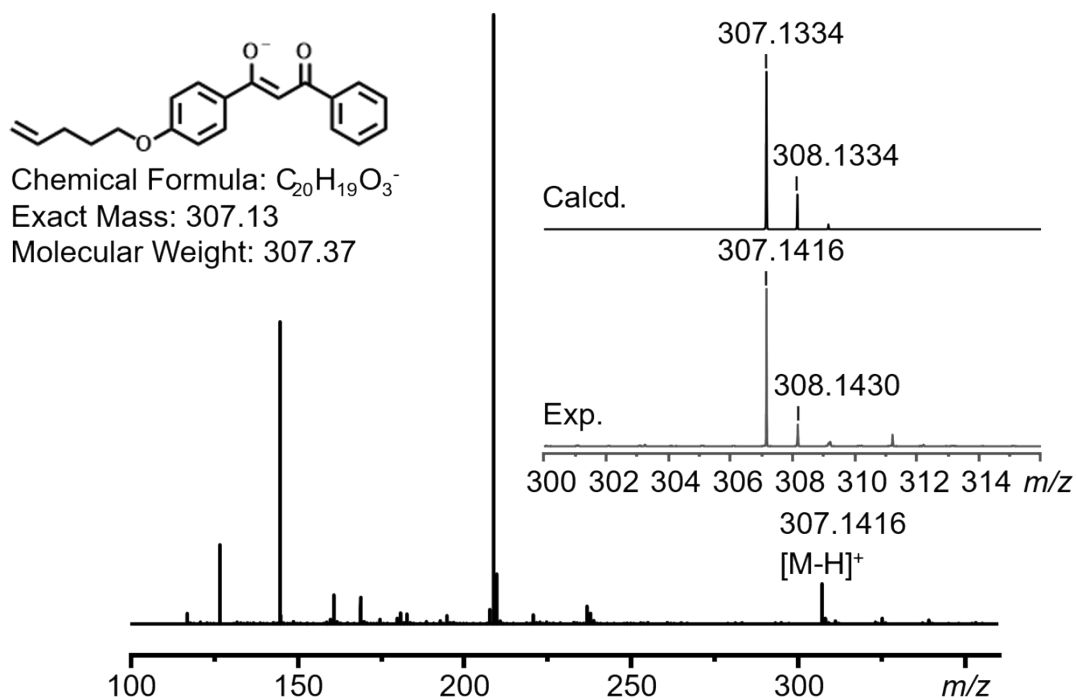

**Figure S10.** ESI-MS mass spectrometry of  $[M-H]^-$ . Illustration: theoretical and experimental diagram of ions.

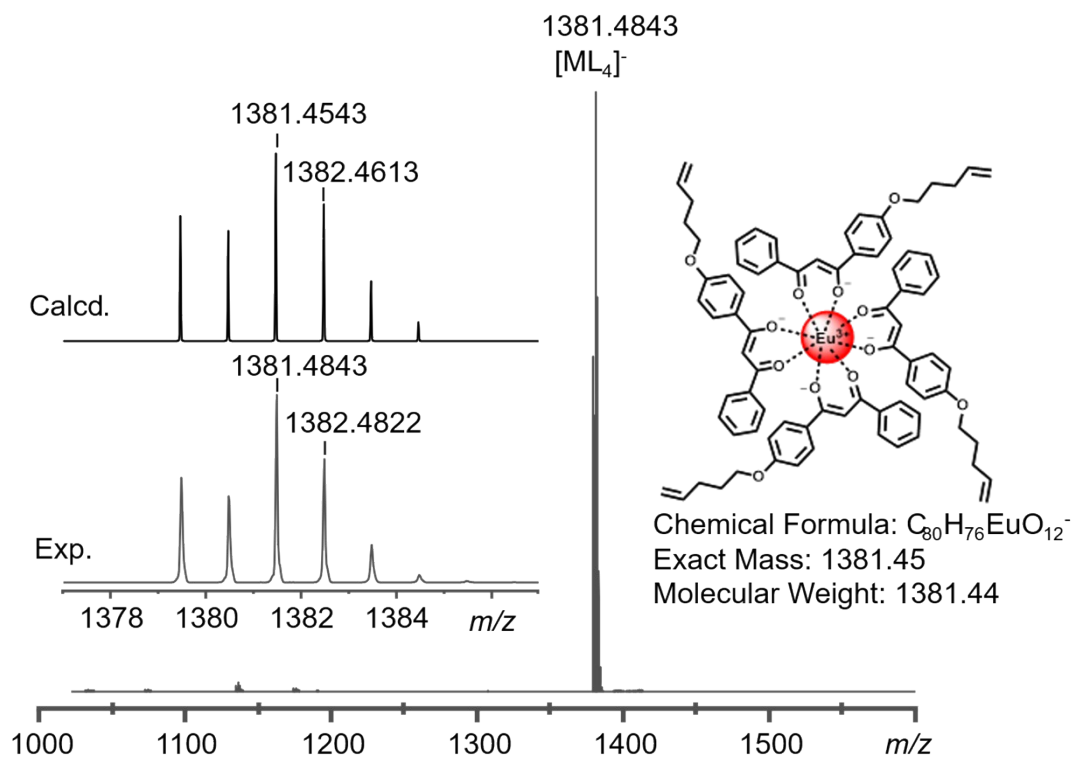

**Figure S11.** ESI-MS mass spectrometry of  $[ML_4]^-$ . Illustration: theoretical and experimental diagram of ions.

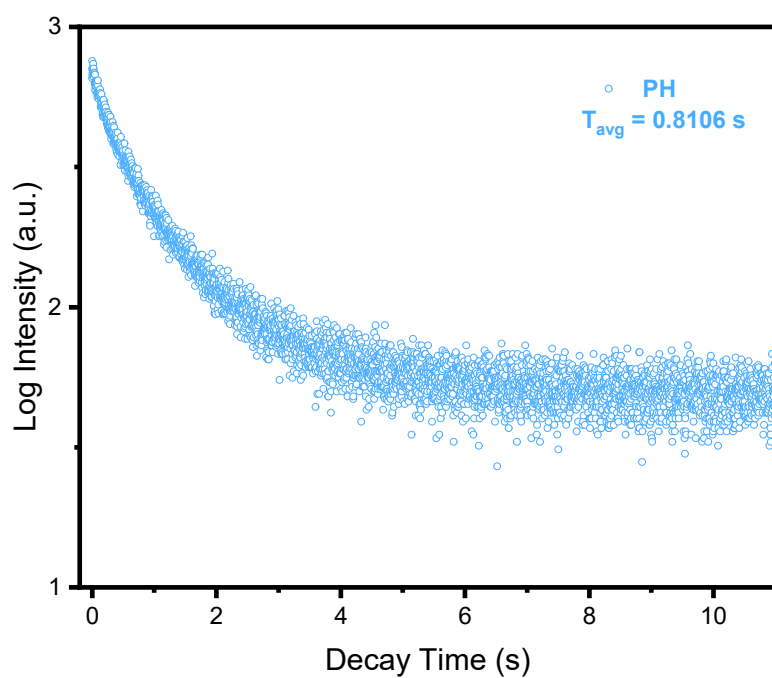

**Figure S12.** Phosphorescence-decay profiles of PH powder.

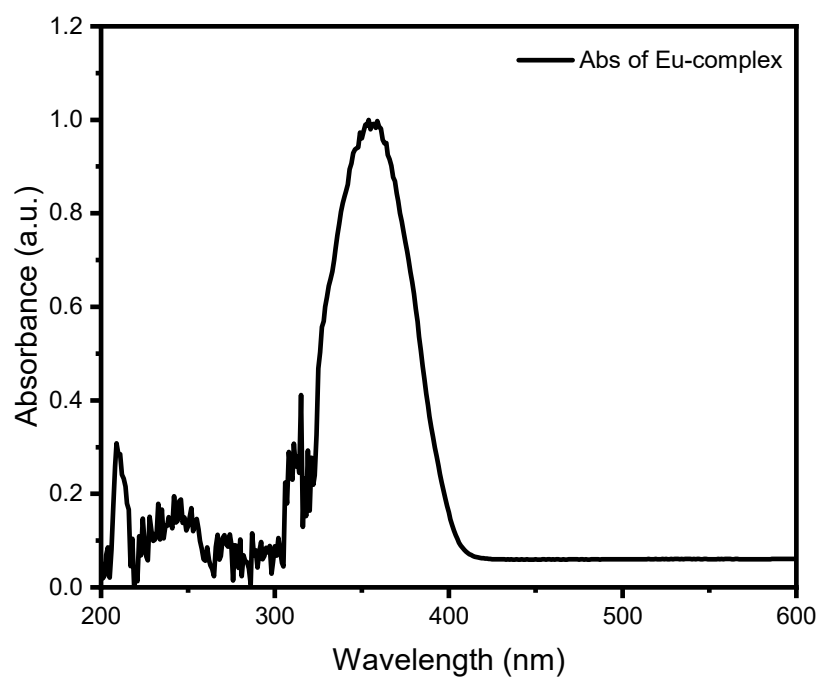

**Figure S13.** UV-vis absorption spectra of Na[EuL<sub>4</sub>].

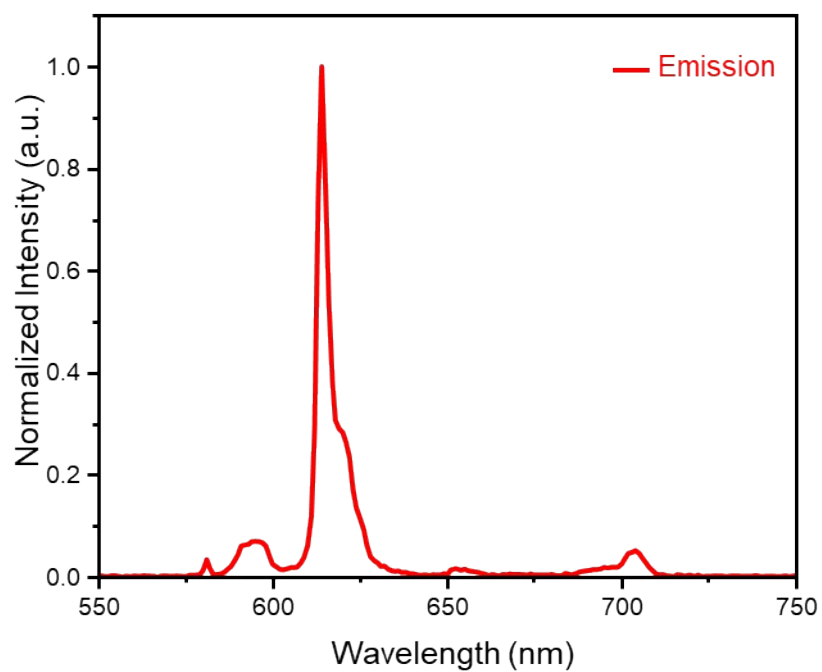

Figure S14. Photoluminescence spectra of Na[EuL<sub>4</sub>].

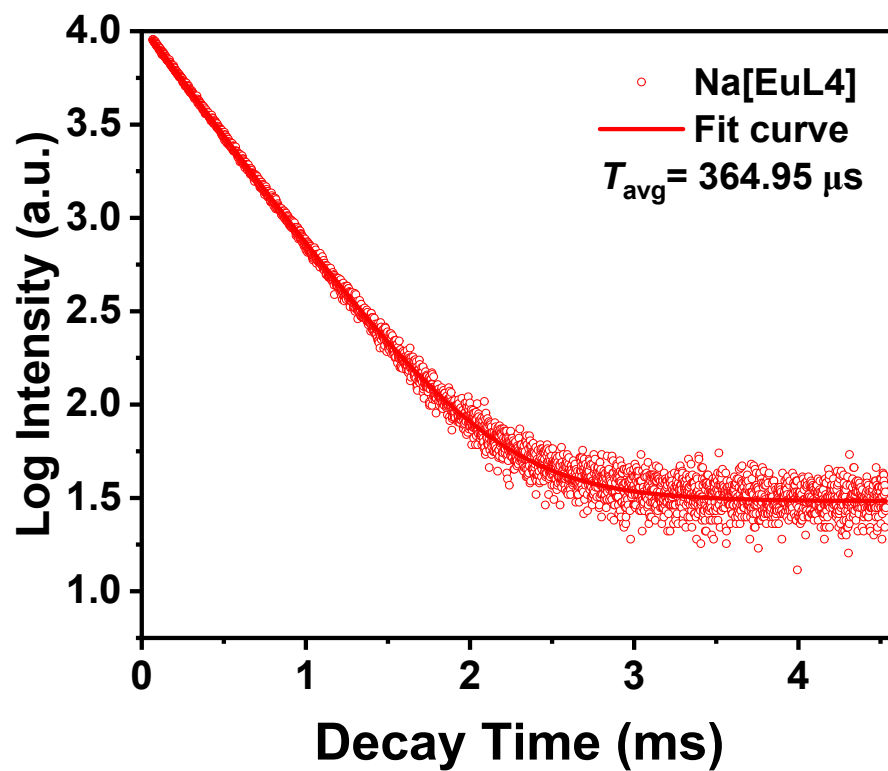

Figure S15. Decay curves at 616 nm for Na[EuL<sub>4</sub>].

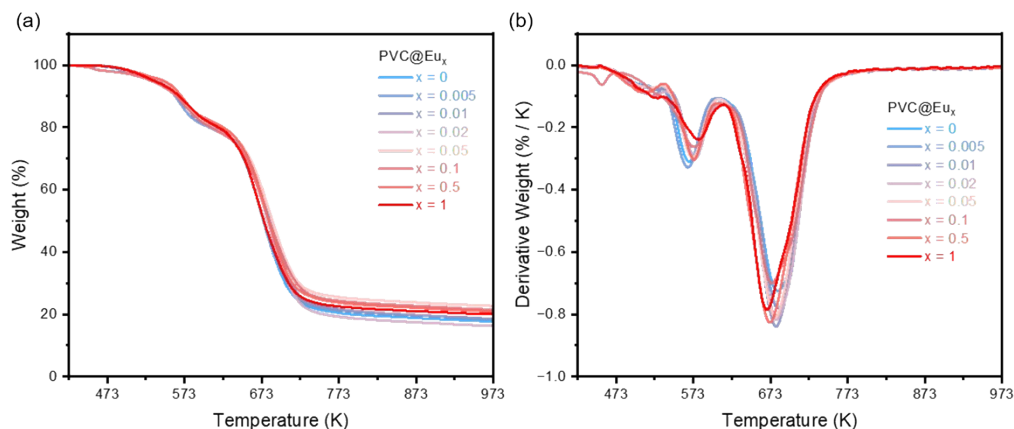

**Figure S16.** (a) TGA curves of PH ( $x=0$ ) and PVC@Eu<sub>x</sub> ( $x = 0.005, 0.01, 0.1, 0.5, 1.0$ ) under N<sub>2</sub> flow (50 mL·min<sup>-1</sup>) with a heating rate of 10 °C·min<sup>-1</sup>. (b) DTG curves corresponding to the TGA data

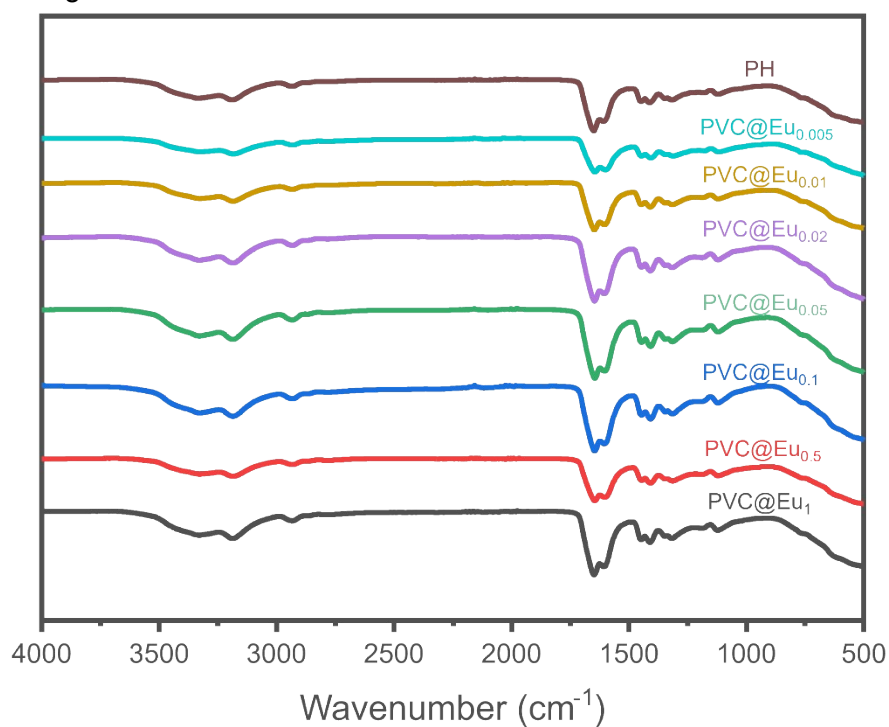

**Figure S17.** Attenuated total reflectance-Fourier transform infrared (ATR-FTIR) spectra of PVC@Eu<sub>x</sub> powers at different doping ratios of Eu<sup>3+</sup> complex.

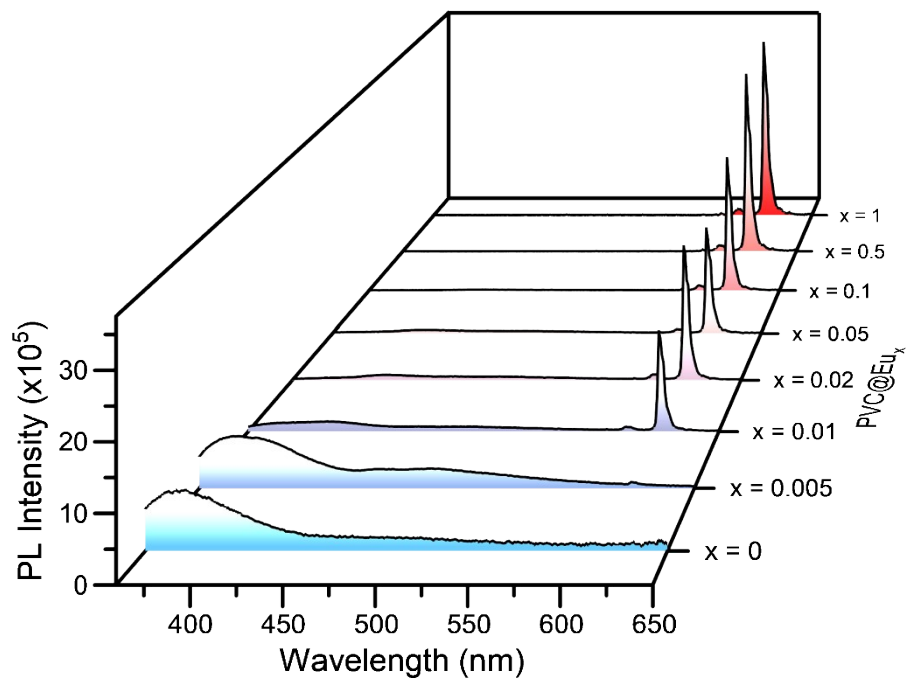

**Figure S18.** Photoluminescence emission spectra of PVC@Eu<sub>x</sub> powders.

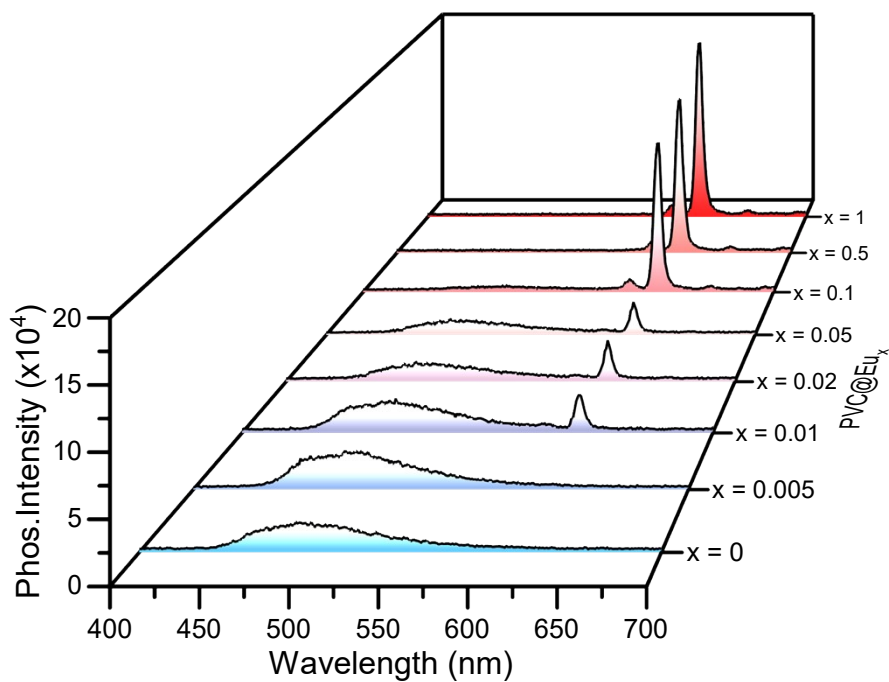

**Figure S19.** Phosphorescence emission spectra of PVC@Eu<sub>x</sub> powders (delay time 1 ms).

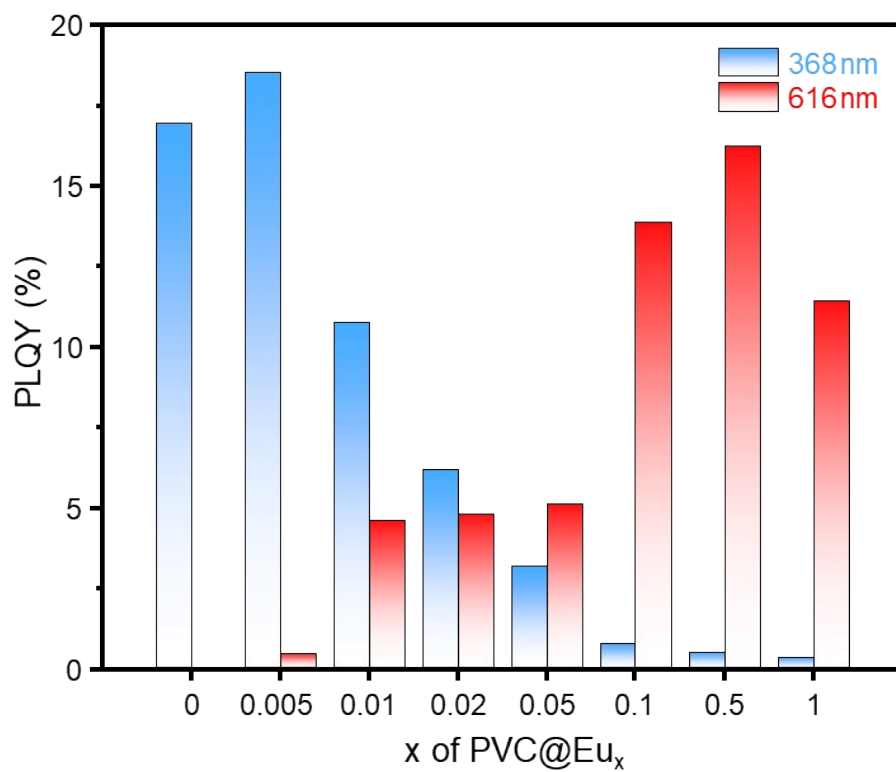

**Figure S20.** Attenuated total reflectance-Fourier transform infrared (ATR-FTIR) spectra of PVC@Eu<sub>x</sub> powers at different doping ratios of Eu<sup>3+</sup> complex.

**Table S1.** Characterizations of polymers by aqueous GPC(a: PH; b-h: PVC@Eu<sub>x</sub>)

x=0.001-1).

a

| Peak   | Mp (g/mol) | Mn (g/mol) | Mw (g/mol) | Mz (g/mol) | Mz+1 (g/mol) | Mv (g/mol) | PD       |
|--------|------------|------------|------------|------------|--------------|------------|----------|
| Peak 1 | 11357      | 6577       | 13014      | 21541      | 31002        | 20245      | 1.978714 |

b

| Peak   | Mp (g/mol) | Mn (g/mol) | Mw (g/mol) | Mz (g/mol) | Mz+1 (g/mol) | Mv (g/mol) | PD       |
|--------|------------|------------|------------|------------|--------------|------------|----------|
| Peak 1 | 9056       | 6803       | 13113      | 22212      | 31694        | 20839      | 1.927532 |

c

| Peak   | Mp (g/mol) | Mn (g/mol) | Mw (g/mol) | Mz (g/mol) | Mz+1 (g/mol) | Mv (g/mol) | PD       |
|--------|------------|------------|------------|------------|--------------|------------|----------|
| Peak 1 | 9179       | 6295       | 11459      | 18148      | 25201        | 17149      | 1.820334 |

d

| Peak   | Mp (g/mol) | Mn (g/mol) | Mw (g/mol) | Mz (g/mol) | Mz+1 (g/mol) | Mv (g/mol) | PD       |
|--------|------------|------------|------------|------------|--------------|------------|----------|
| Peak 1 | 14423      | 7834       | 13986      | 21923      | 30584        | 20722      | 1.785295 |

e

| Peak   | Mp (g/mol) | Mn (g/mol) | Mw (g/mol) | Mz (g/mol) | Mz+1 (g/mol) | Mv (g/mol) | PD       |
|--------|------------|------------|------------|------------|--------------|------------|----------|
| Peak 1 | 13716      | 7027       | 14242      | 24026      | 34672        | 22548      | 2.026754 |

f

| Peak   | Mp (g/mol) | Mn (g/mol) | Mw (g/mol) | Mz (g/mol) | Mz+1 (g/mol) | Mv (g/mol) | PD      |
|--------|------------|------------|------------|------------|--------------|------------|---------|
| Peak 1 | 15360      | 7684       | 14655      | 23159      | 32137        | 21901      | 1.90721 |

g

| Peak   | Mp (g/mol) | Mn (g/mol) | Mw (g/mol) | Mz (g/mol) | Mz+1 (g/mol) | Mv (g/mol) | PD       |
|--------|------------|------------|------------|------------|--------------|------------|----------|
| Peak 1 | 11574      | 6926       | 13460      | 22551      | 32752        | 21154      | 1.943402 |

h

| Peak   | Mp (g/mol) | Mn (g/mol) | Mw (g/mol) | Mz (g/mol) | Mz+1 (g/mol) | Mv (g/mol) | PD       |
|--------|------------|------------|------------|------------|--------------|------------|----------|
| Peak 1 | 11647      | 6816       | 13491      | 22879      | 33677        | 21422      | 1.979313 |
